# Supplementary material for: Silica- and polymer-supported platinum(II) polypyridyl complexes: synthesis and application in photosensitized oxidation of alkenes
Source: Royal Society of Chemistry journal article supplement (doi:10.1039/b916488j), 2009-01-01
Supplement: b916488j.pdf [file b916488j.pdf]

# Silica- and Polymer-Supported Platinum(II) Polypyridyl Complexes: Synthesis and Application in Photosensitized Oxidation of Alkenes

*Ke Feng, Ming-Li Peng, Deng-Hui Wang, Li-Ping Zhang, Chen-Ho Tung and Li-Zhu Wu\**

*Key Laboratory of Photochemical Conversion and Optoelectronic Materials, Technical Institute of Physics and Chemistry, the Chinese Academy of Sciences, Beijing, 100190, P. R. China. Fax: 86 10 8254 3580; Tel: 86 10 8254 3580; E-mail: lzwu@mail.ipc.ac.cn*

## Electronic Supplementary Information

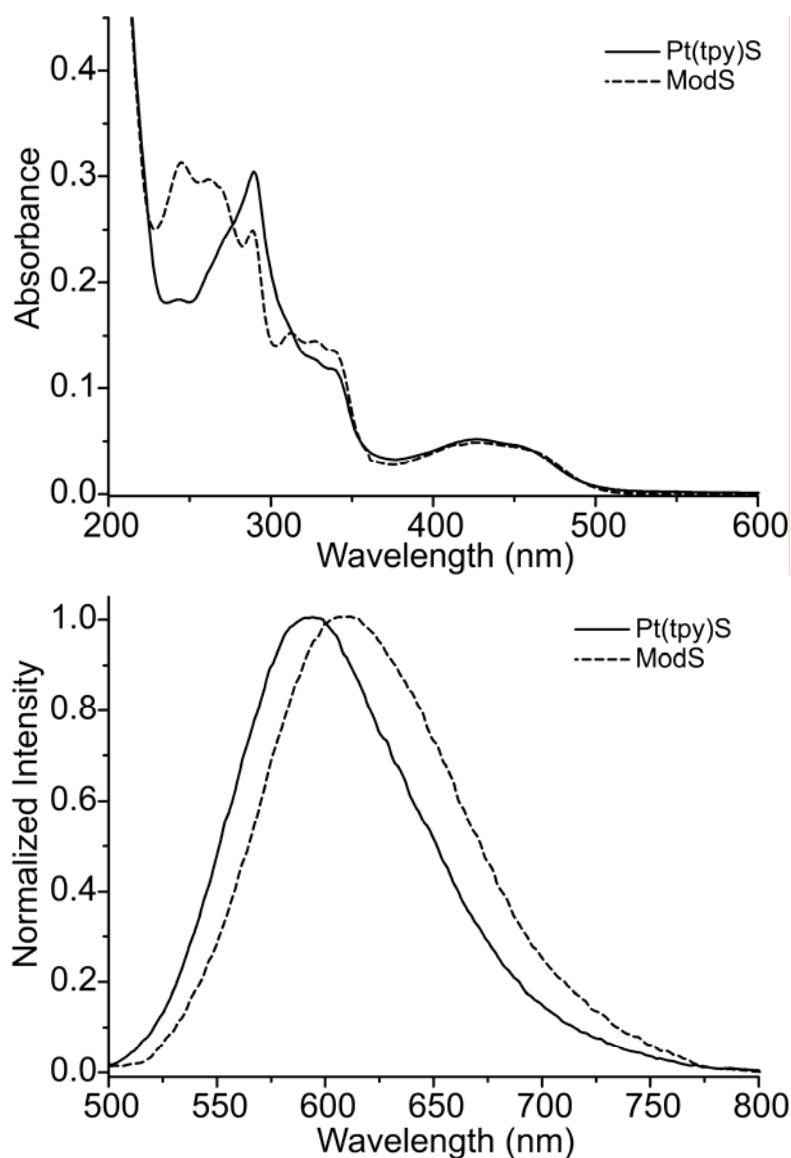

**Fig. S1** The UV/visible and fluorescence spectra of **Pt(tpy)S** and **ModS** in acetonitrile.

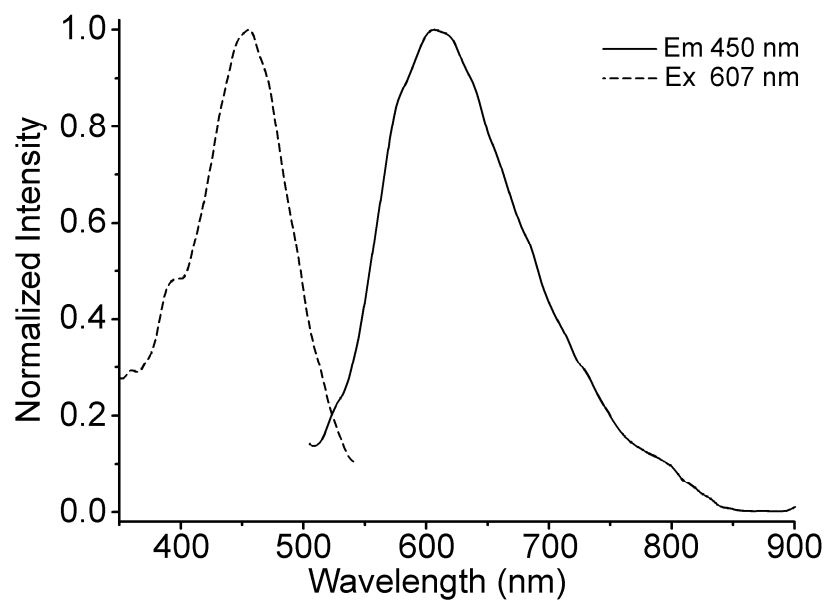

**Fig. S2** The solid state fluorescence spectra of **Pt(tpy)SG**.

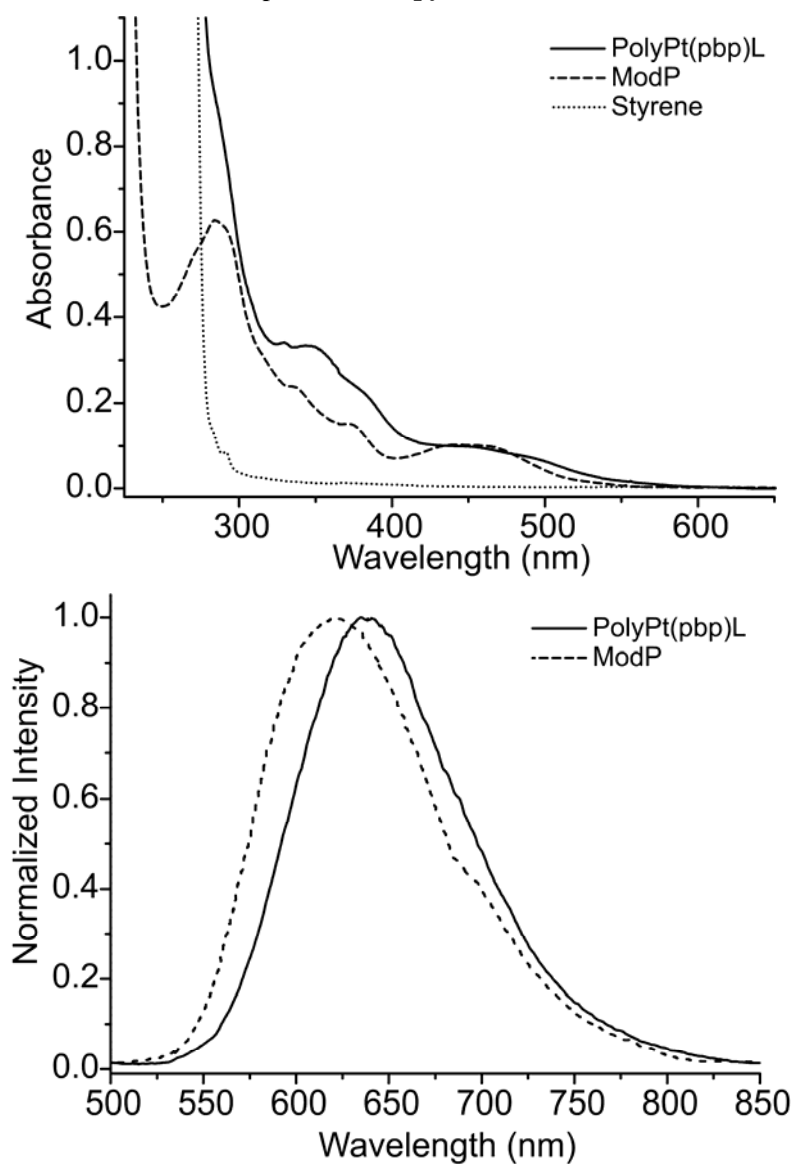

**Fig. S3** The UV/visible and fluorescence spectra of **PolyPt(pbp)L** and **ModP** in dichloromethane.

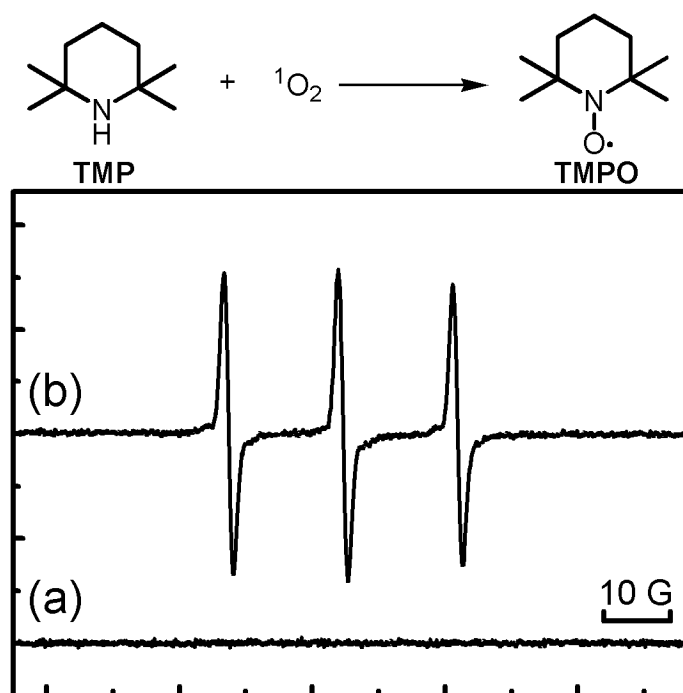

**Fig. S4** ESR spectrum of nitroxide radical generated by irradiation of the oxygen-saturated TMP solution in methanol in the presence of **Pt(tpy)SG**. (a) in dark; (b) after the sample was irradiated for 100s.

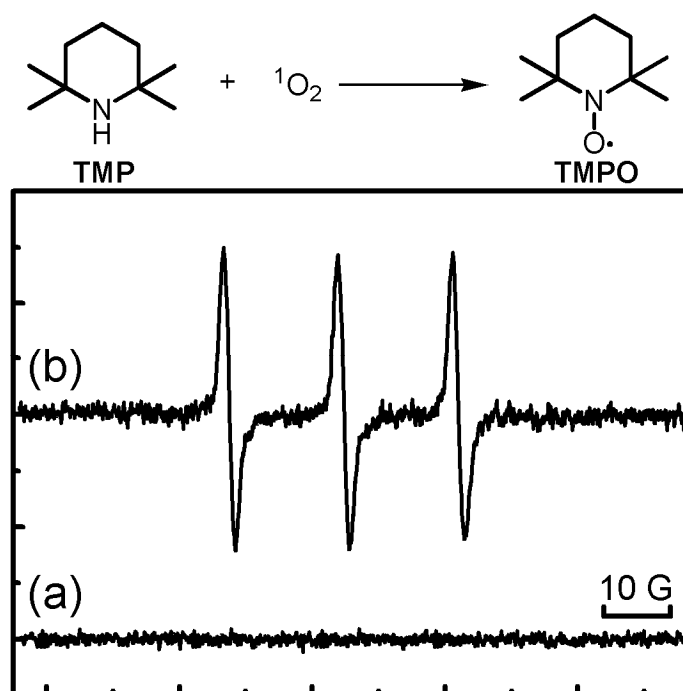

**Fig. S5** ESR spectrum of nitroxide radical generated by irradiation of the oxygen-saturated TMP solution in dichloromethane in the presence of **PolyPt(pbp)L**. (a) in dark; (b) after the sample was irradiated for 100s.
